# Supplementary material for: Chikungunya Infection Increases Osteoclastogenic Genes Ex-pression in Blood and Chronic Arthralgia May Be Related to Enhanced Osteoclast Survival
Source: Preprints.org preprint supplement (doi:10.20944/preprints202408.0080.v1), 2024-08-02
Supplement: Supplementary file 1 [file supplementary]

**Table S1.** Differentially expressed genes in CHIKV- and DENV-infected samples.

| **Gene** | **CHIKV**  **log2FoldChange** | **CHIKV**  **padj** | **DENV**  **log2FoldChange** | **DENV**  **padj** |
| --- | --- | --- | --- | --- |
| CEBPA | 0.72 | 0.000033 | -0.12 | 0.5844875 |
| FCER1G | 2.08 | 0.000000 | 1.91 | 0.0000000 |
| FOS | 1.90 | 0.000000 | 0.08 | 0.8726659 |
| JUN | 2.99 | 0.000000 | -0.43 | 0.0368901 |
| MAPK10 | 0.68 | 0.003251 | 1.96 | 0.0378769 |
| MAPK8 | 0.31 | 0.000891 | -0.52 | 0.0005112 |
| NFATC1 | 0.81 | 0.000330 | -0.01 | 0.9390283 |
| NFKB1 | 0.52 | 0.008601 | 0.14 | 0.4168015 |
| NFKB2 | 2.29 | 0.000000 | 0.47 | 0.0129732 |
| RELA | 1.34 | 0.000000 | 0.37 | 0.0119984 |
| SP1 | 0.37 | 0.004499 | 0.59 | 0.0000375 |
| TNFRSF11A | 0.94 | 0.004819 | -0.05 | 0.9545348 |
| TRAF6 | 1.48 | 0.000000 | 0.39 | 0.0382718 |
| WNT5A | 3.01 | 0.000518 | - | - |
| ZBTB7A | 1.55 | 0.000000 | 0.11 | 0.3841900 |


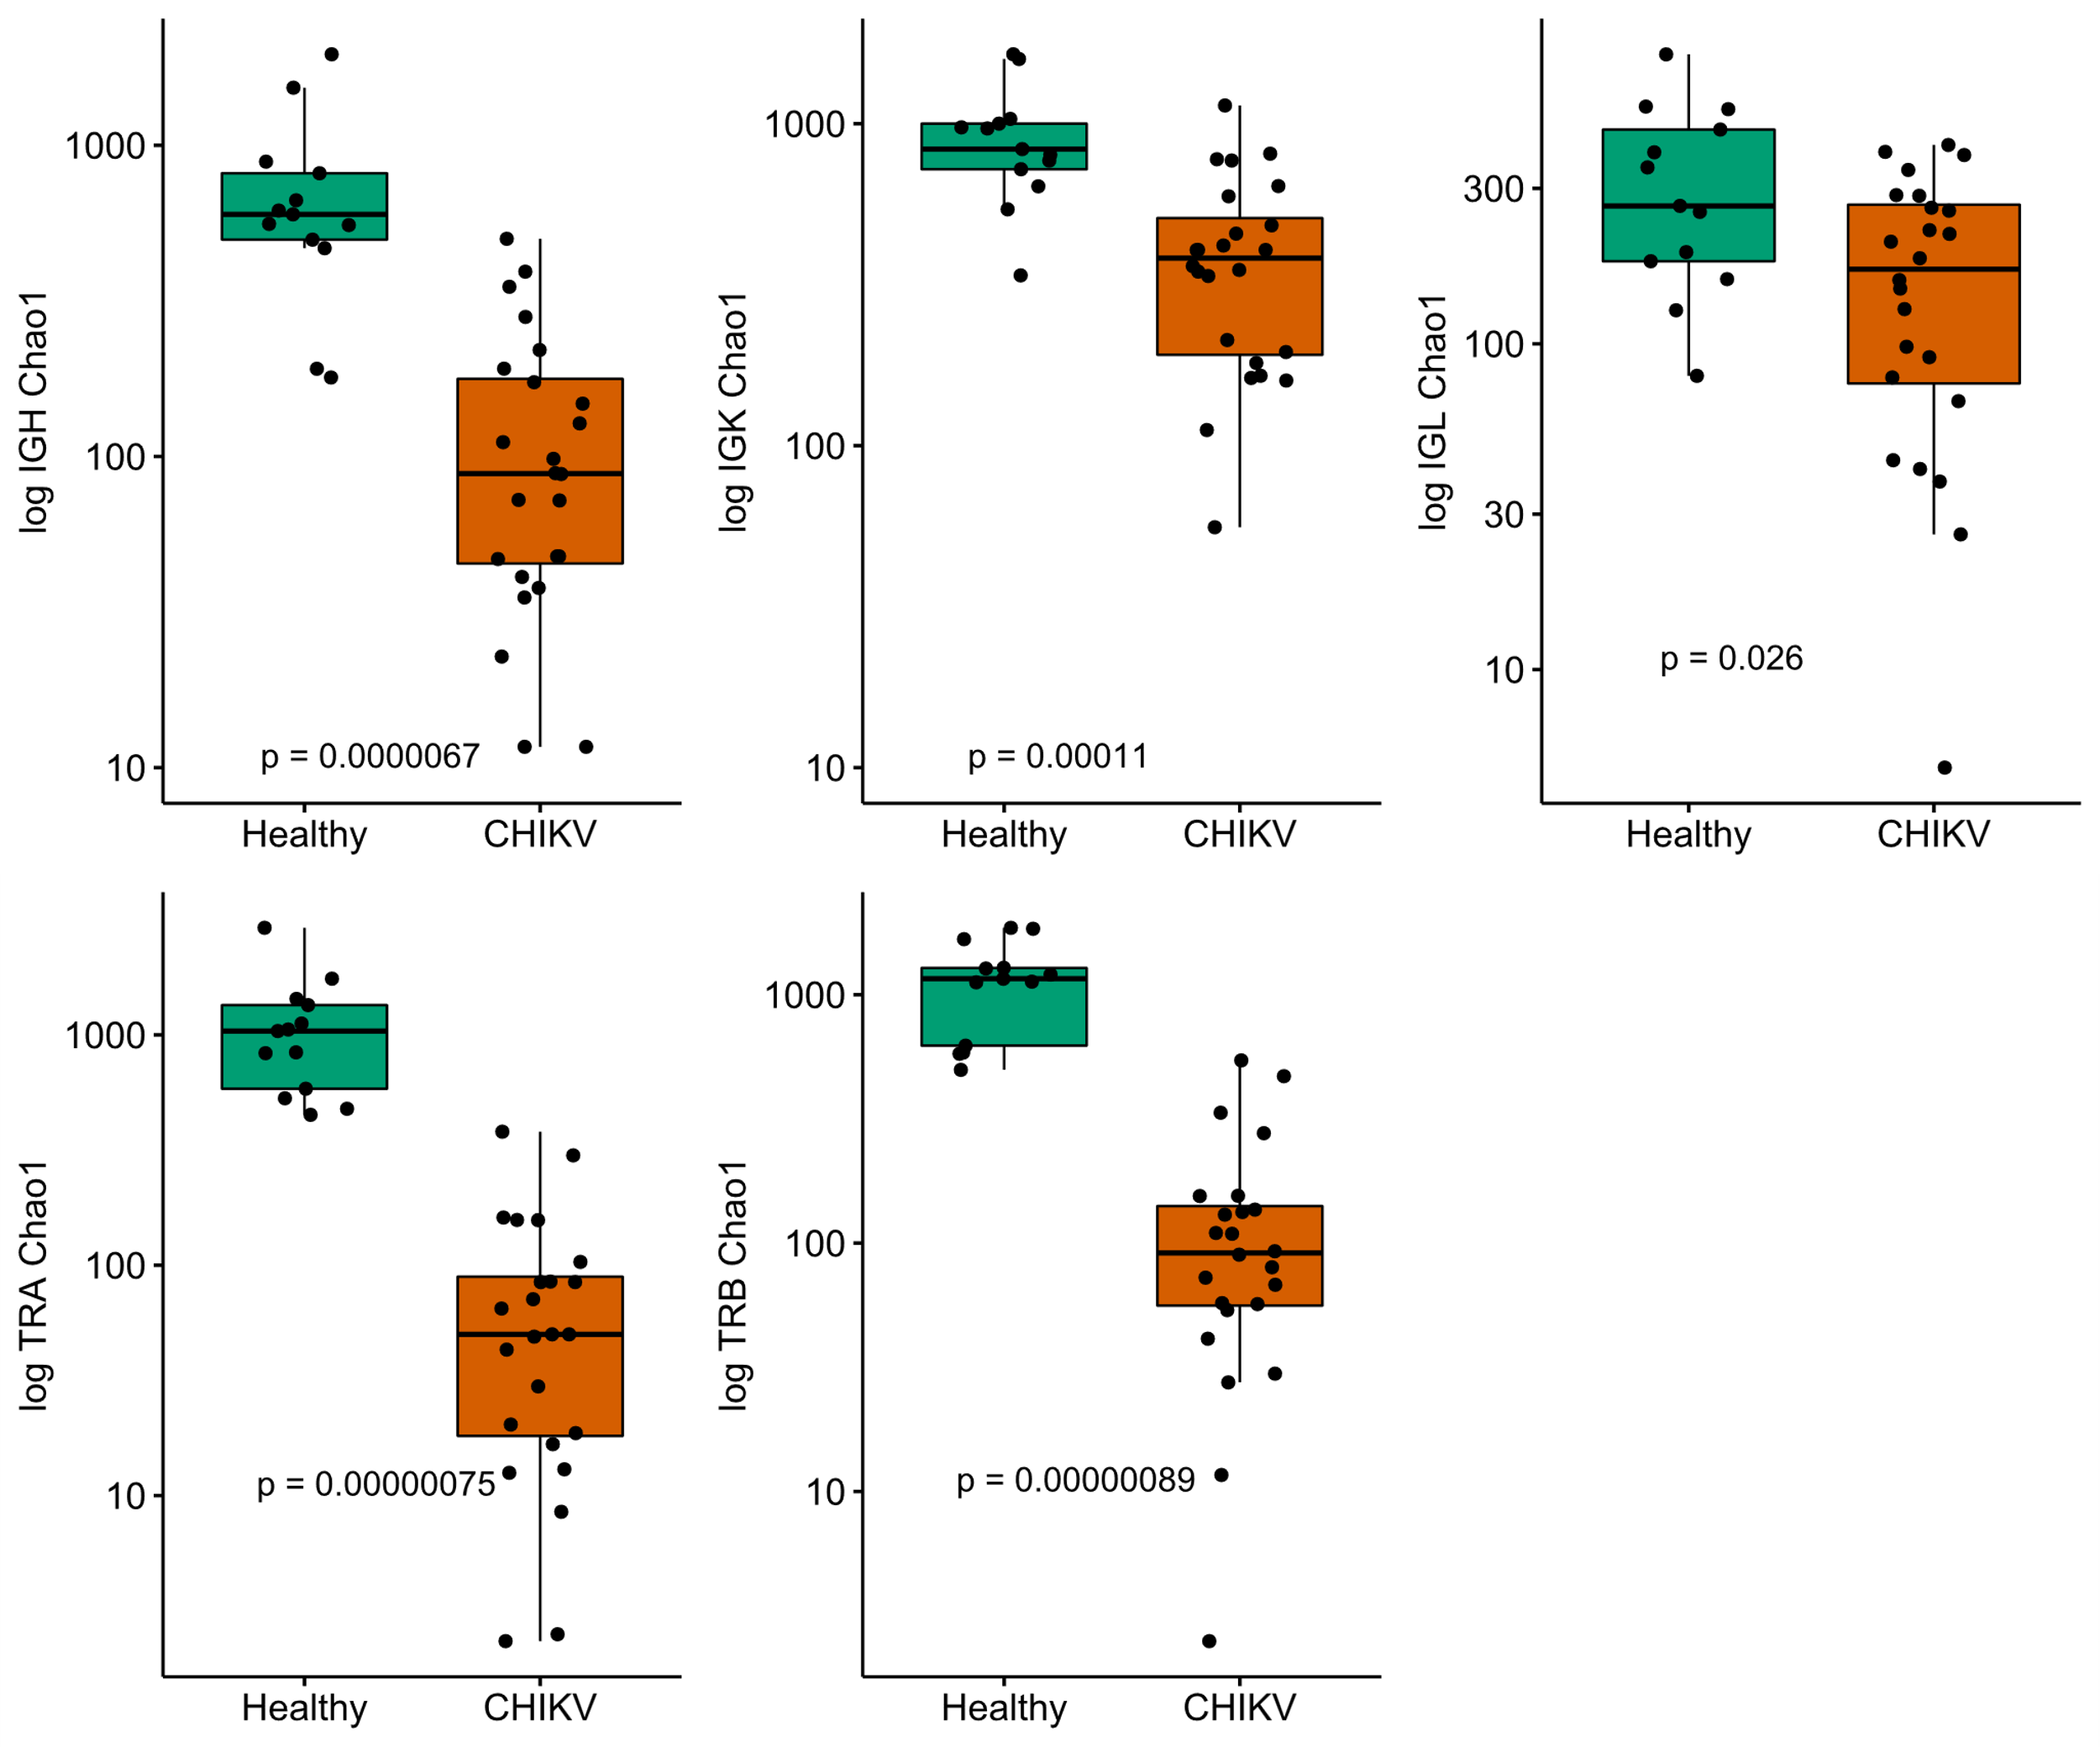

**Figure S1. CDR3 diversity is lower in CHIKV-infected samples.** Estimated Chao1 diversity for B cell (IGH, IGK, and IGL chains) and T cell receptors (TRA and TRB chains) of healthy (green) and infected with Chikungunya virus (orange) individuals. Wilcoxon-Mann-Whitney test *p*-values are shown for each comparison.


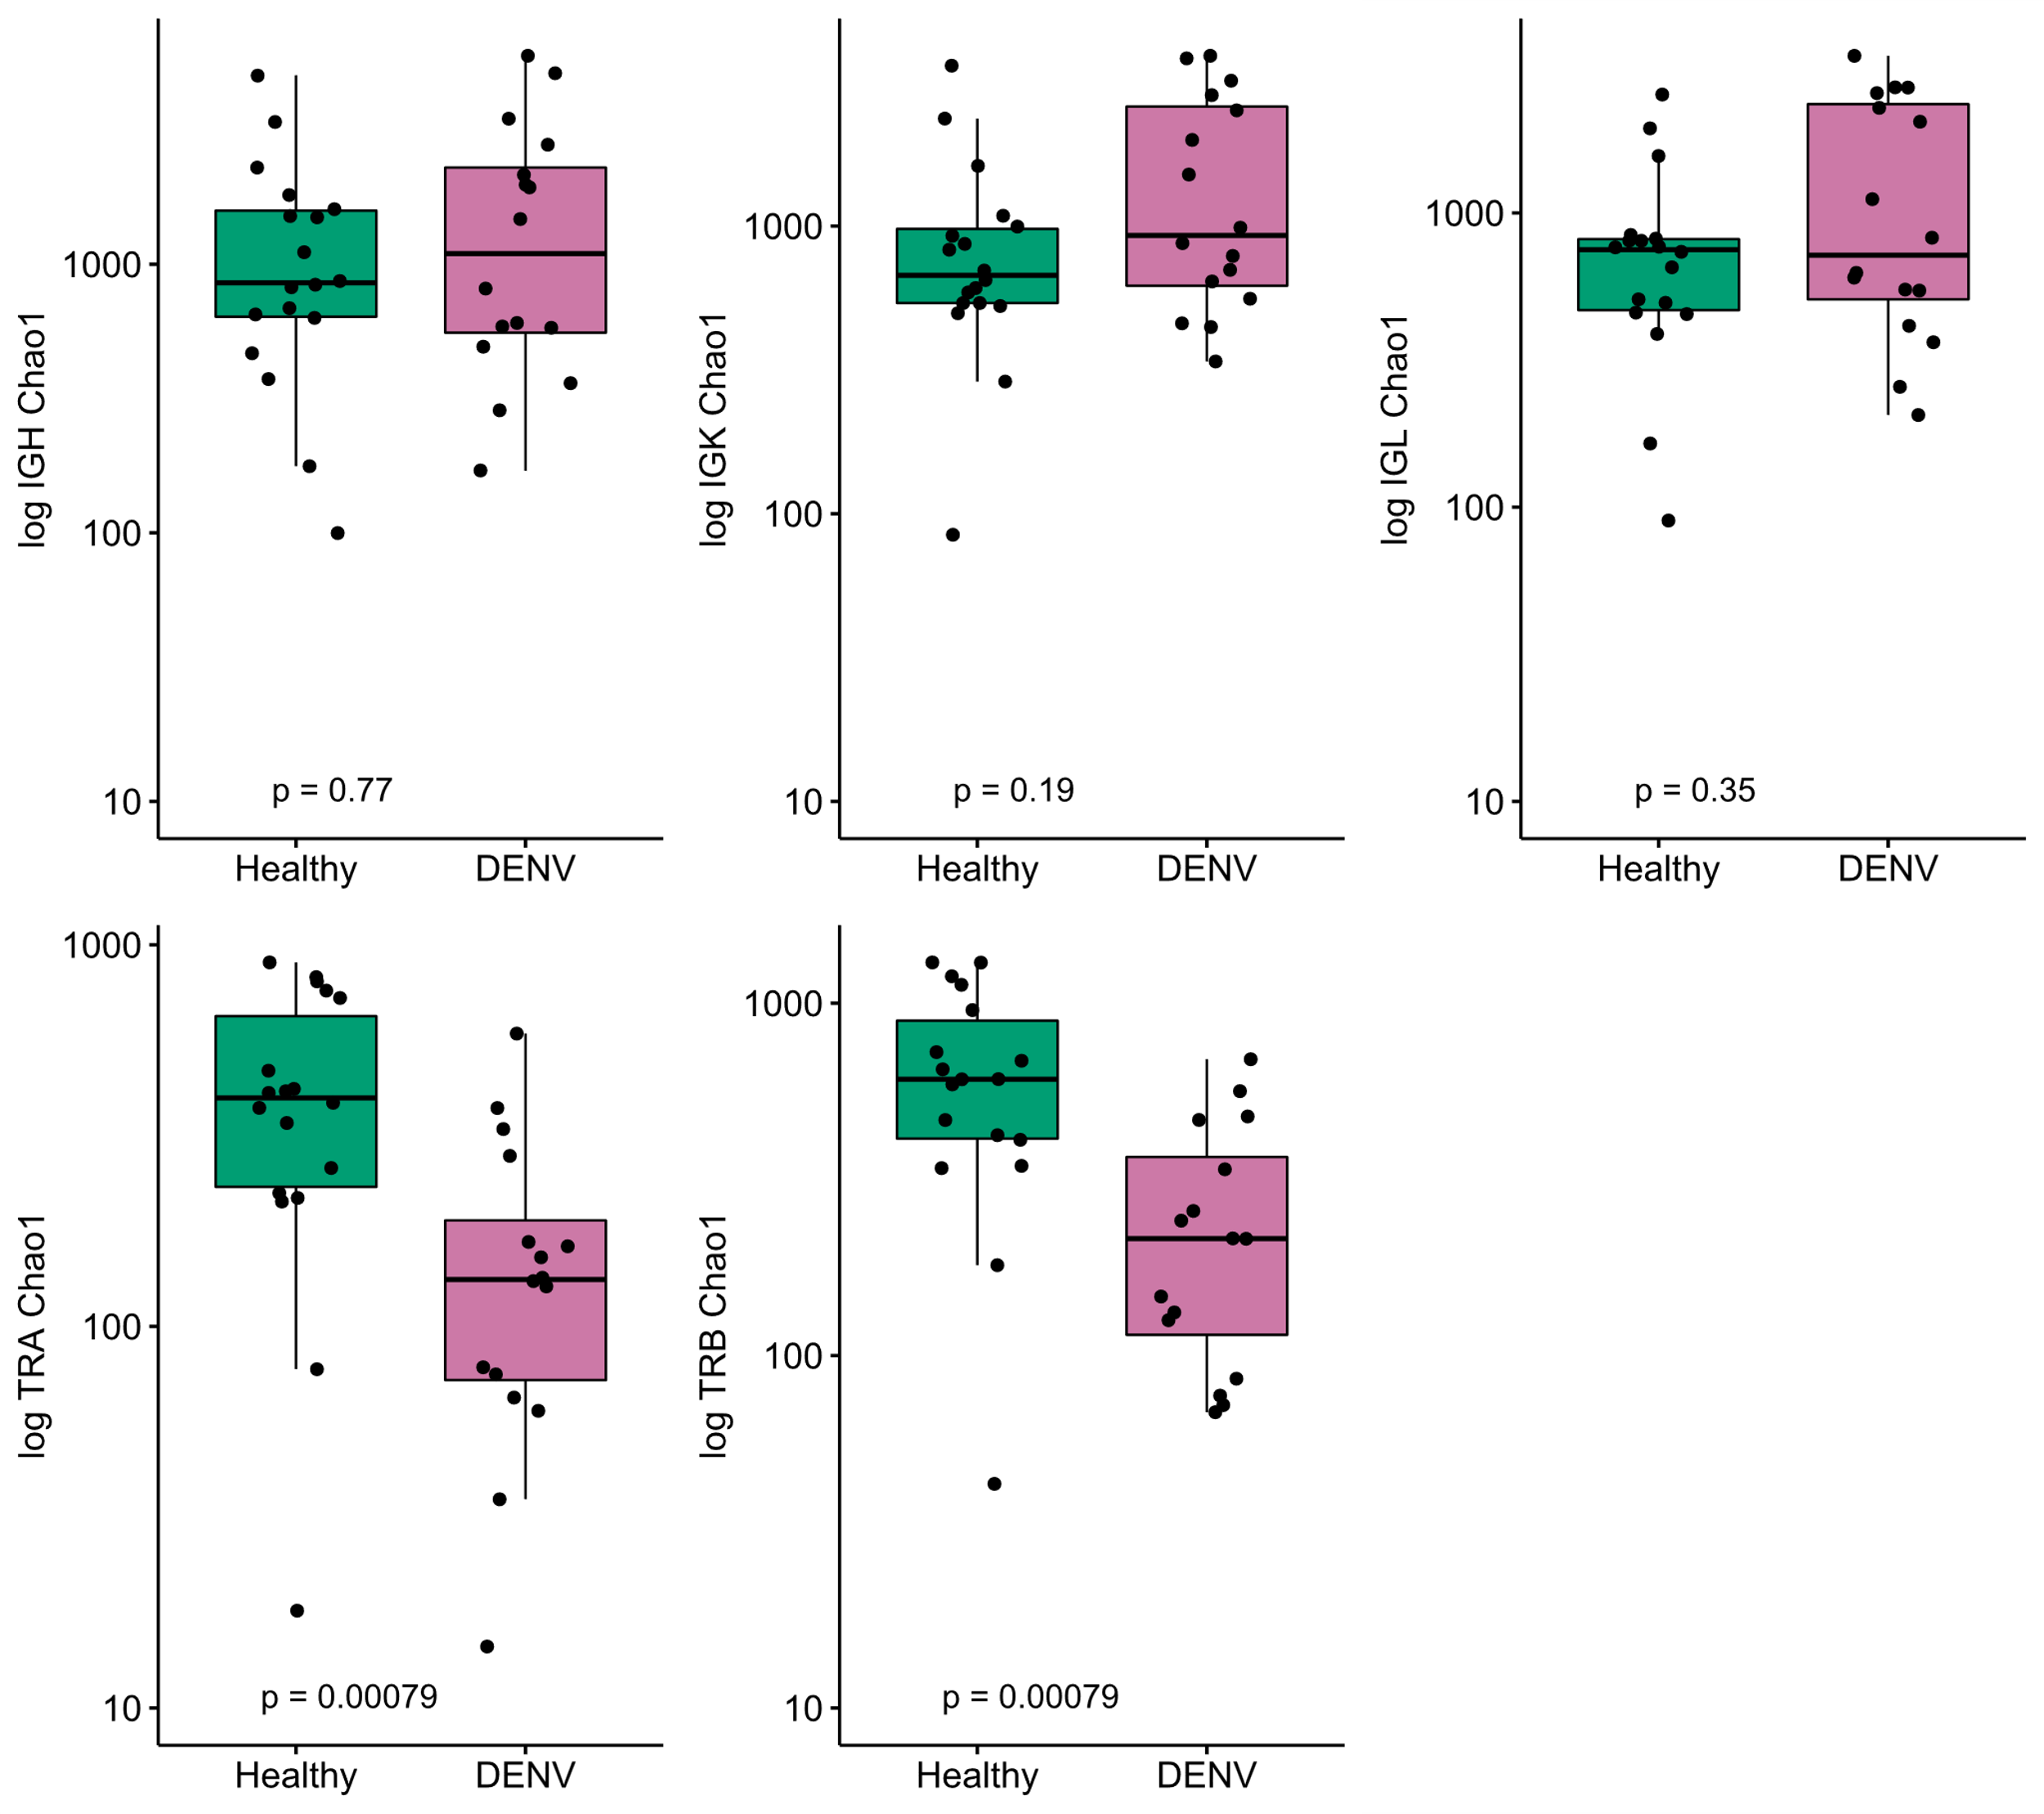


**Figure S2. T cell CDR3 diversity is lower in DENV-infected samples.** Estimated Chao1 diversity for B cell (IGH, IGK, and IGL chains) and T cell receptors (TRA and TRB chains) of healthy (green) and infected with Chikungunya virus (orange) individuals. Wilcoxon-Mann-Whitney test p-values are shown for each comparison.

**
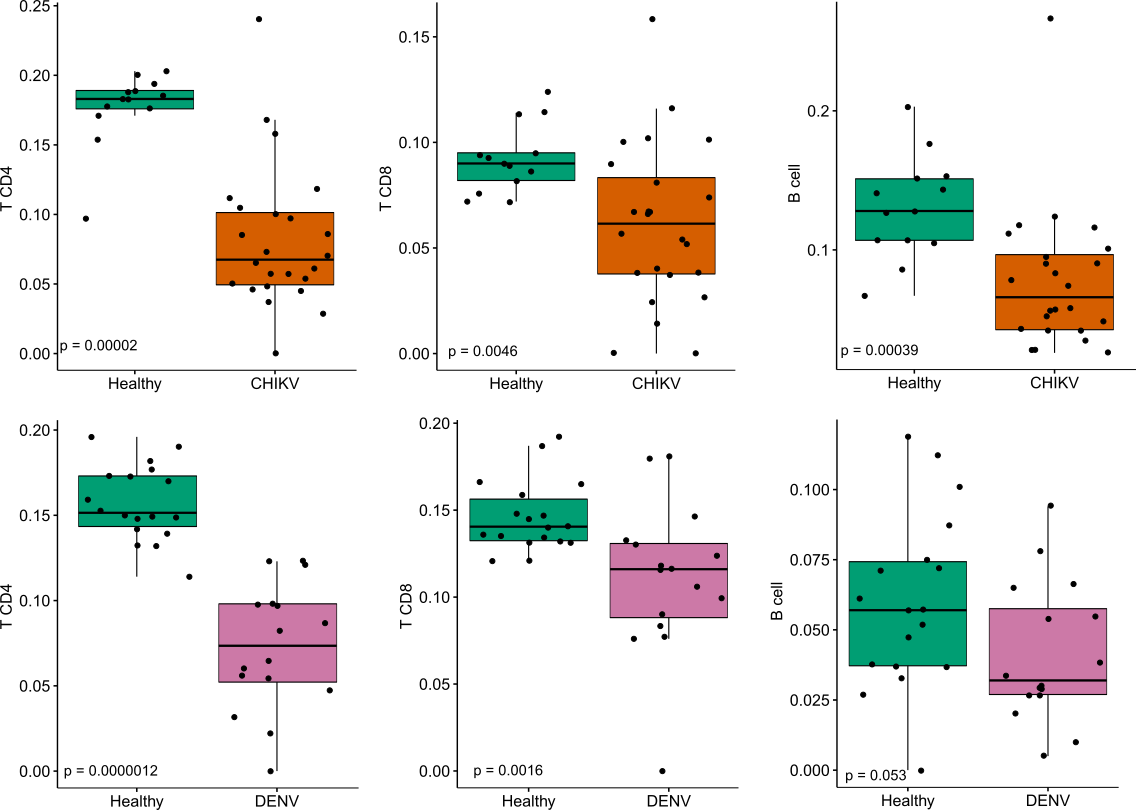
**

**Figure S3. Changes in the cellular abundances of T and B cells in Chikungunya and Dengue virus infections.** Estimation of cell proportions in samples from healthy individuals (green), Chikungunya-infected individuals (orange), and Dengue-infected individuals (pink). Wilcoxon-Mann-Whitney test *p*-values are shown for each comparison.
